# Supplementary material
Source: publisher figshare collection journal article supplement (https://acs.figshare.com/ndownloader/files/3794170)
Supplement: Supplementary file 1 [file 3794170]

**High Efficiency Antimicrobial Thiazolium and Triazolium Side-Chain  
Polymethacrylates Obtained by Controlled Alkylation of the Corresponding Azole  
Derivatives**

*Rubén Tejero,<sup>†</sup> Daniel López,<sup>†\*</sup> Fátima López-Fabal,<sup>‡</sup> José L. Gómez-Garcés,<sup>‡</sup> and Marta Fernández-García<sup>†\*</sup>*

<sup>†</sup>Instituto de Ciencia y Tecnología de Polímeros (ICTP-CSIC), Juan de la Cierva 3, 28006 Madrid, Spain.

<sup>‡</sup>Hospital Universitario de Móstoles, Río Júcar, s/n, 28935 Móstoles, Madrid, Spain.

Corresponding author: DL [daniel@ictp.csic.es](mailto:daniel@ictp.csic.es); MFG [marta fg@ictp.csic.es](mailto:marta fg@ictp.csic.es)

**Electronic Supplementary Information**

**Table of contents**

|    |                                                                               |         |
|----|-------------------------------------------------------------------------------|---------|
| 1. | Determination of the Degree of Quaternization (DQ)                            | S2      |
| 2. | Kinetics of Quaternization of <b>PMTA1-Bul</b>                                | S2      |
| 3. | Kinetics of Quaternization of <b>PMTA4-Bul</b>                                | S3-S4   |
| 4. | Deconvolution of <sup>1</sup> H-NMR spectra of <b>PMTA4-Bul</b>               | S4-S10  |
| 5. | Integration Data and Species (%) involved in quaternation of <b>PMTA4-Bul</b> | S10-S21 |
| 6. | Biological Assays                                                             | S22-S25 |

## 1. Determination of the Degree of Quaternization by <sup>1</sup>H-NMR spectroscopy:

### 1.1 Determination of the Degree of Quaternization (DQth) of PMTA1 by <sup>1</sup>H-NMR spectroscopy:

We were able to determine the DQth (%) from the relationship conformed by the integrals of peaks related to thiazole/thiazolium protons as follows:

$$\text{DQth (\%)} = \frac{\text{Integral (Thiazolium proton A}_2\text{)}}{\text{Integral (Thiazolium proton A}_2\text{ + Thiazole proton A}_1\text{)}} \times 100$$

### 1.2 Determination of the Degree of Quaternization (DQth and DQtr) of PMTA4 by <sup>1</sup>H-NMR spectroscopy:

We were able to determine the DQth (%) from the relationship between the integrals of peaks associated to thiazole/thiazolium protons in every species as follows:

$$\text{DQth (\%)} = \frac{\text{Integral (Thiazolium A}_4\text{ + A}_3\text{)}}{\text{Integral (Thiazolium A}_4\text{ + A}_3\text{ + Thiazole A}_2\text{ + A}_1\text{)}} \times 100$$

Similarly, we were able to determine the DQtr (%) from the relationship between the integrals of peaks associated to triazole/triazolium protons in every species as follows:

$$\text{DQtr (\%)} = \frac{\text{Integral (Triazolium B}_4\text{ + B}_2\text{)}}{\text{Integral (Triazolium B}_4\text{ + B}_2\text{ + Triazole B}_3\text{ + B}_1\text{)}} \times 100$$

## 2. Kinetics and Degree of Quaternization (DQ) of PMTA1-Bul

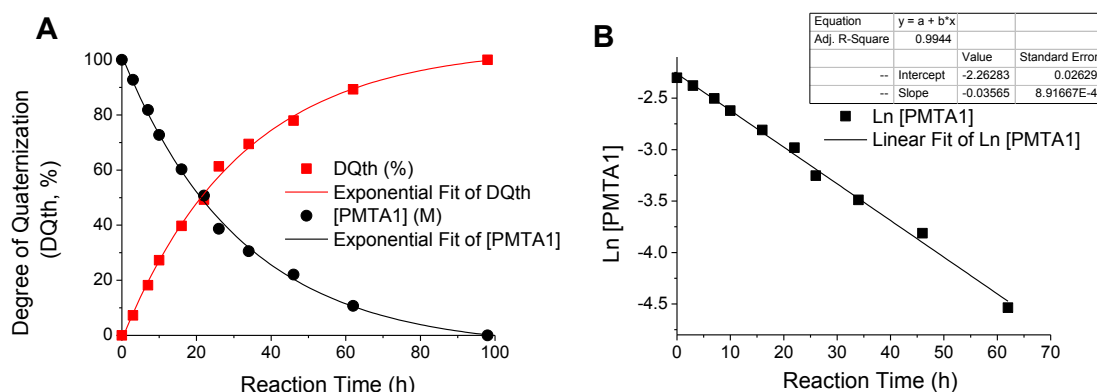

**Figure S1.** A) Degree of Quaternization (DQth) of **PMTA1** versus Reaction Time determined by <sup>1</sup>H-NMR spectroscopy. B) First-order Kinetics Quaternization Reaction by plotting Ln [PMTA1] versus Reaction Time.

The modification of PMTA1 with butyl iodide proceeds as a first-order reaction as can be seen in Figure S1B and follow the first-order rate law:

$$[\text{PMTA1}] = [\text{PMTA1}]_0 e^{-kt}$$

$$\ln[\text{PMTA1}] = \ln[\text{PMTA1}]_0 - kt$$

$$k = 0.0356 \text{ h}^{-1} = 9.9 \times 10^{-6} \text{ s}^{-1}$$

### 3. Kinetics and Degree of Quaternization (DQ) of PMTA4-Bul

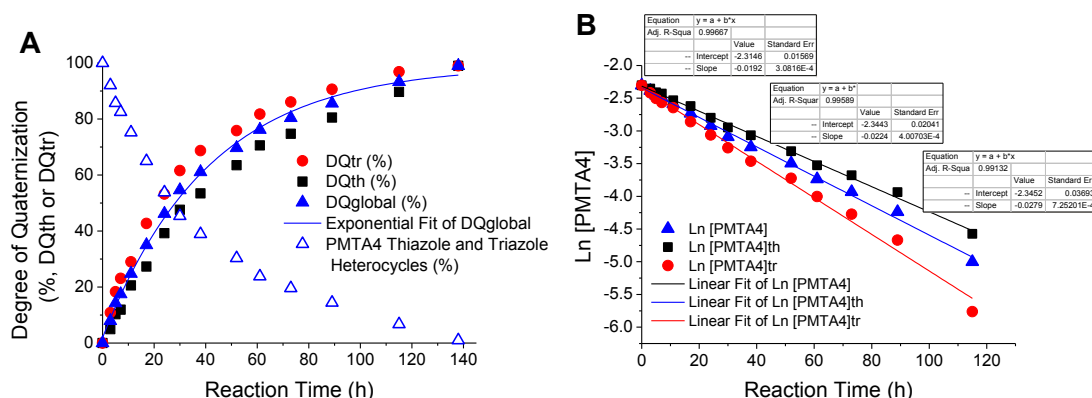

**Figure S2.** A) Degree of Quaternization of both heterocycles (Thiazole, DQth and Triazole, DQtr) implicit in **PMTA4** as well as the global degree, DQ<sub>global</sub> versus Reaction Time determined by <sup>1</sup>H-NMR spectroscopy. B) First-order Kinetics Quaternization Reaction of **PMTA4** by plotting Ln [PMTA4] versus Reaction Time.

The modification of bisheterocyclic PMTA4 with butyl iodide also proceeds as a first-order reaction as can be seen in Figure S2B and follow the first-order rate law:

$$[\text{PMTA4}] = [\text{PMTA4}]_0 e^{-kt}$$

$$\ln[\text{PMTA4}] = \ln[\text{PMTA4}]_0 - kt$$

$$k = 0.0224 \text{ h}^{-1} = 6.2 \times 10^{-6} \text{ s}^{-1}$$

considering the amount of quaternized heterocyclic, it is possible to estimate each triazole or thiazole modification kinetic constant, being  $k_{th} = 0.0192 \text{ h}^{-1} = 5.3 \times 10^{-6} \text{ s}^{-1}$  and  $k_{tr} = 0.0279 \text{ h}^{-1} = 7.8 \times 10^{-6} \text{ s}^{-1}$ .

Comparing PMTA1 and PMTA4 kinetics constants of quaternization reaction, it is noticed that all of them present values of the same order ( $\approx 10^{-6} \text{ s}^{-1}$ ). Furthermore, PMTA4, which is

even quaternized with large excess of butyl iodide (5.0 equiv.), undergoes a quaternization kinetic slightly slower than PMTA1 maybe due to the more complex bis-heterocyclic structure as well as the repulsion of cationic species involved during the quaternization reaction.

#### **4. Deconvolution of $^1\text{H}$ -NMR spectra**

In order to analyze the percentage of chemical species of PMTA4-Bul during the quaternization reaction, deconvolution of the  $^1\text{H}$ -NMR spectra and integration data were done with the support of MestReNova 8.1.1-11591 NMR analysis software as shown below.

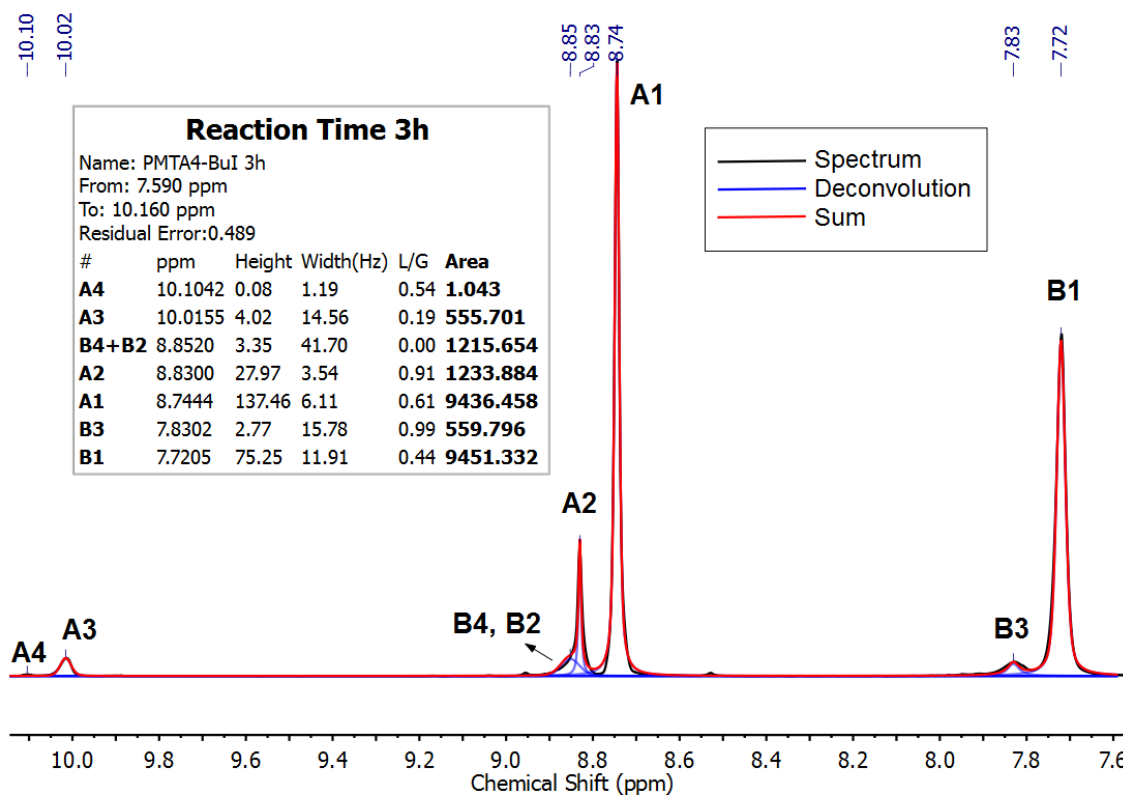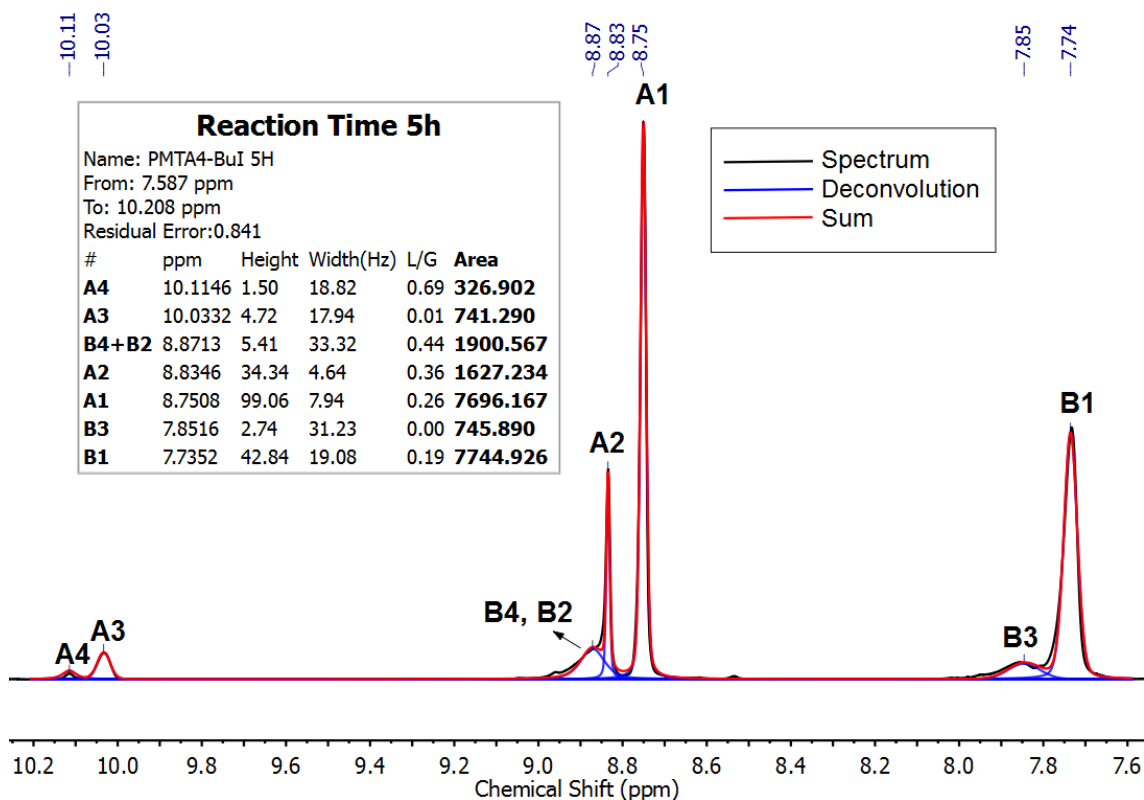

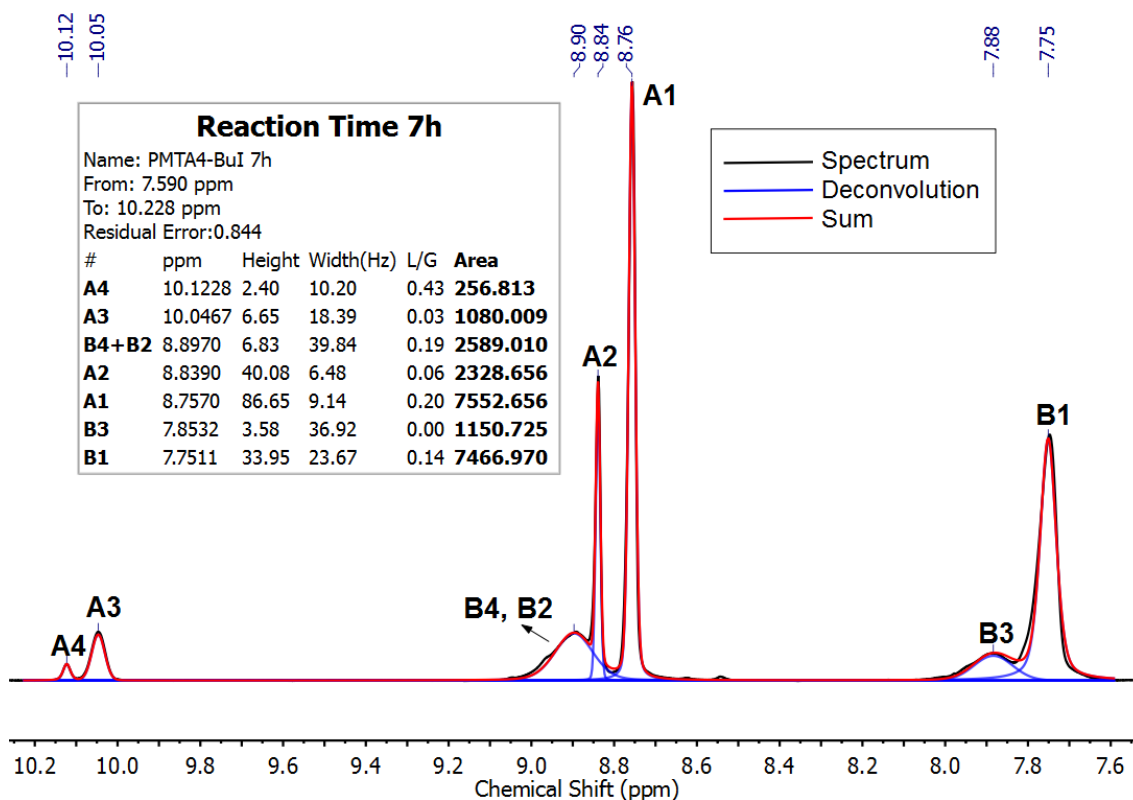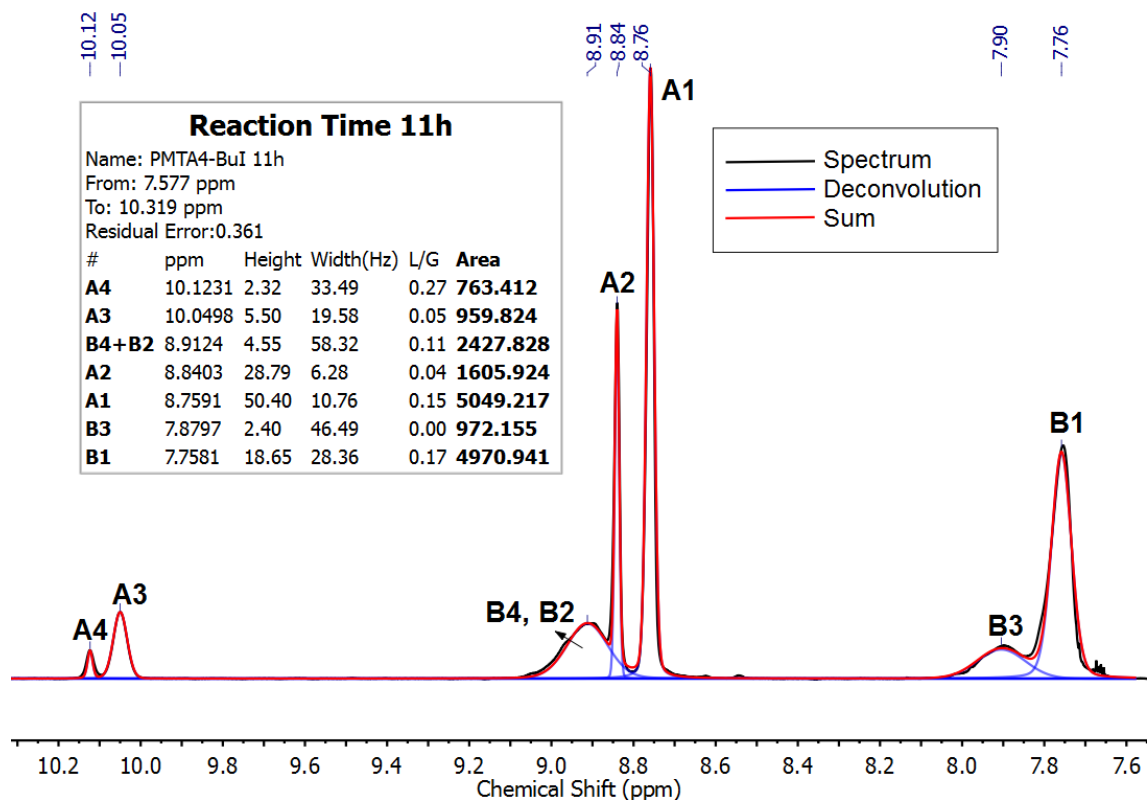

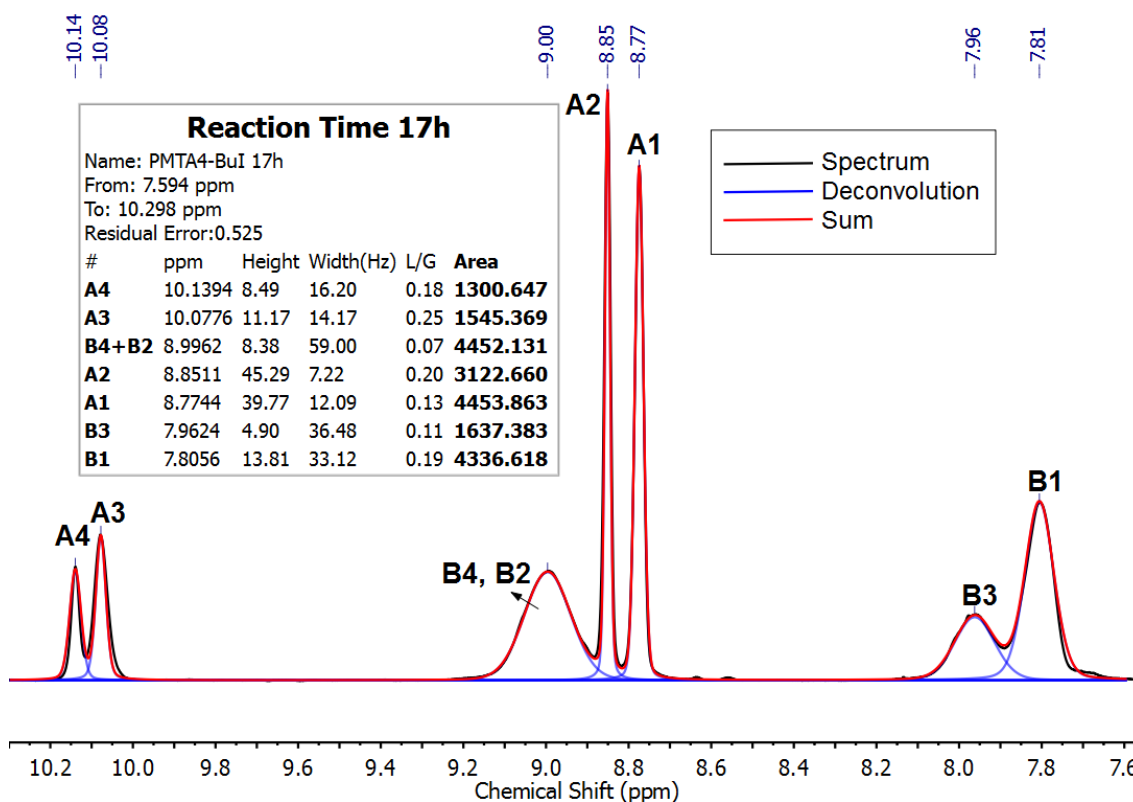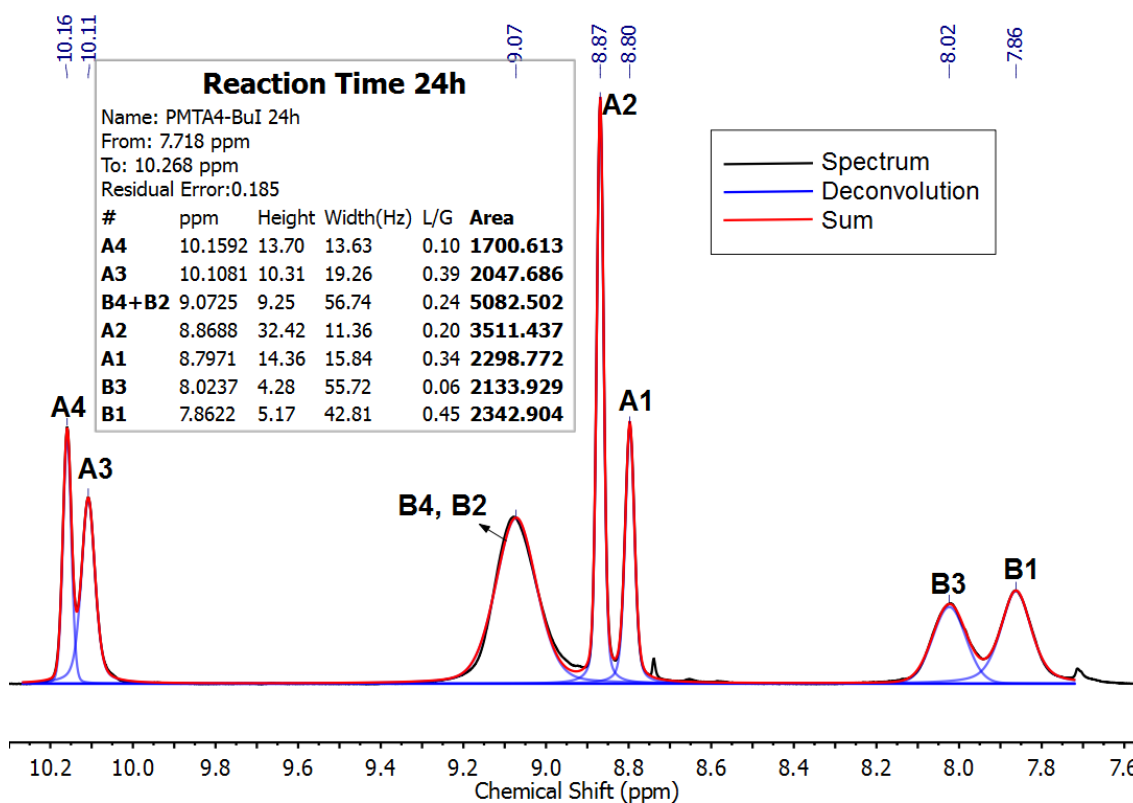

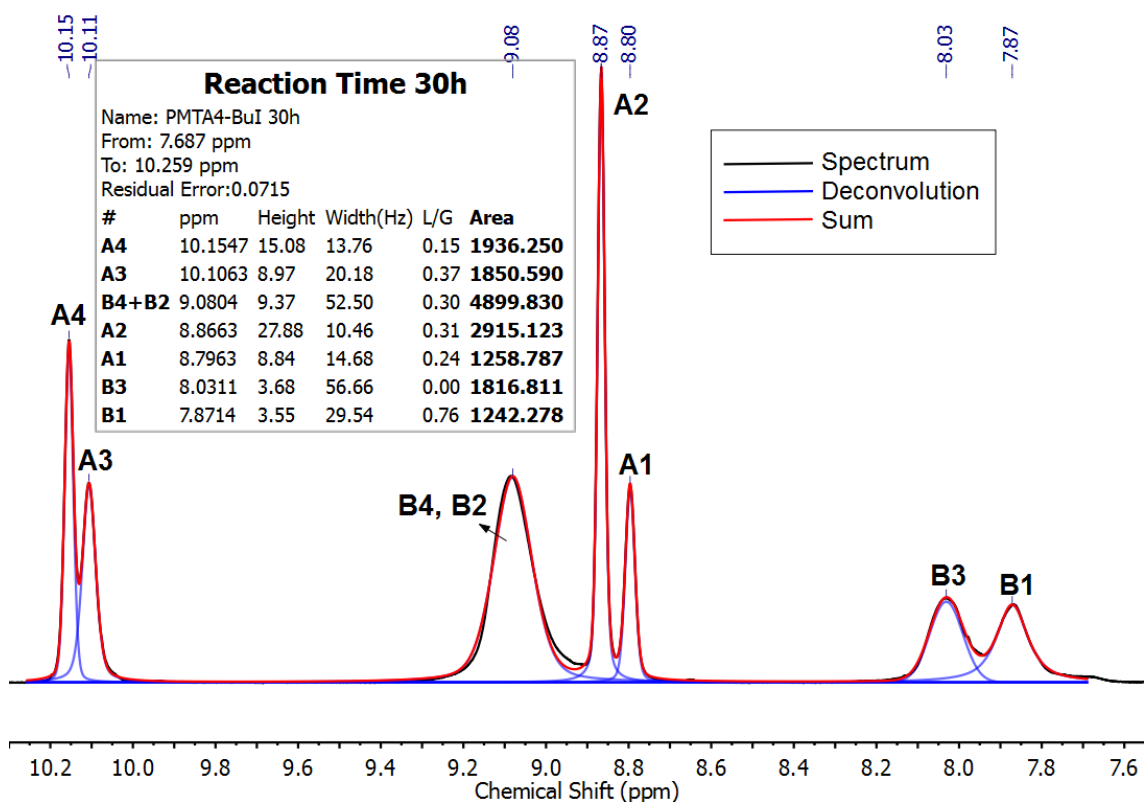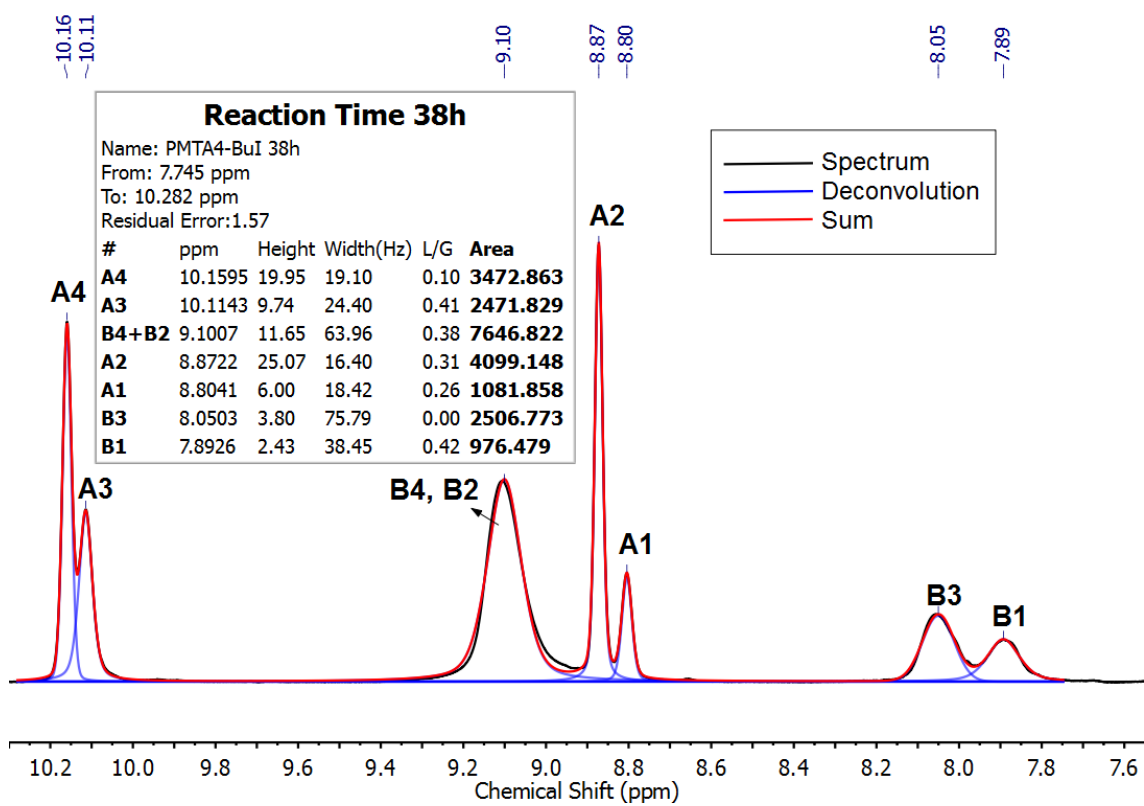



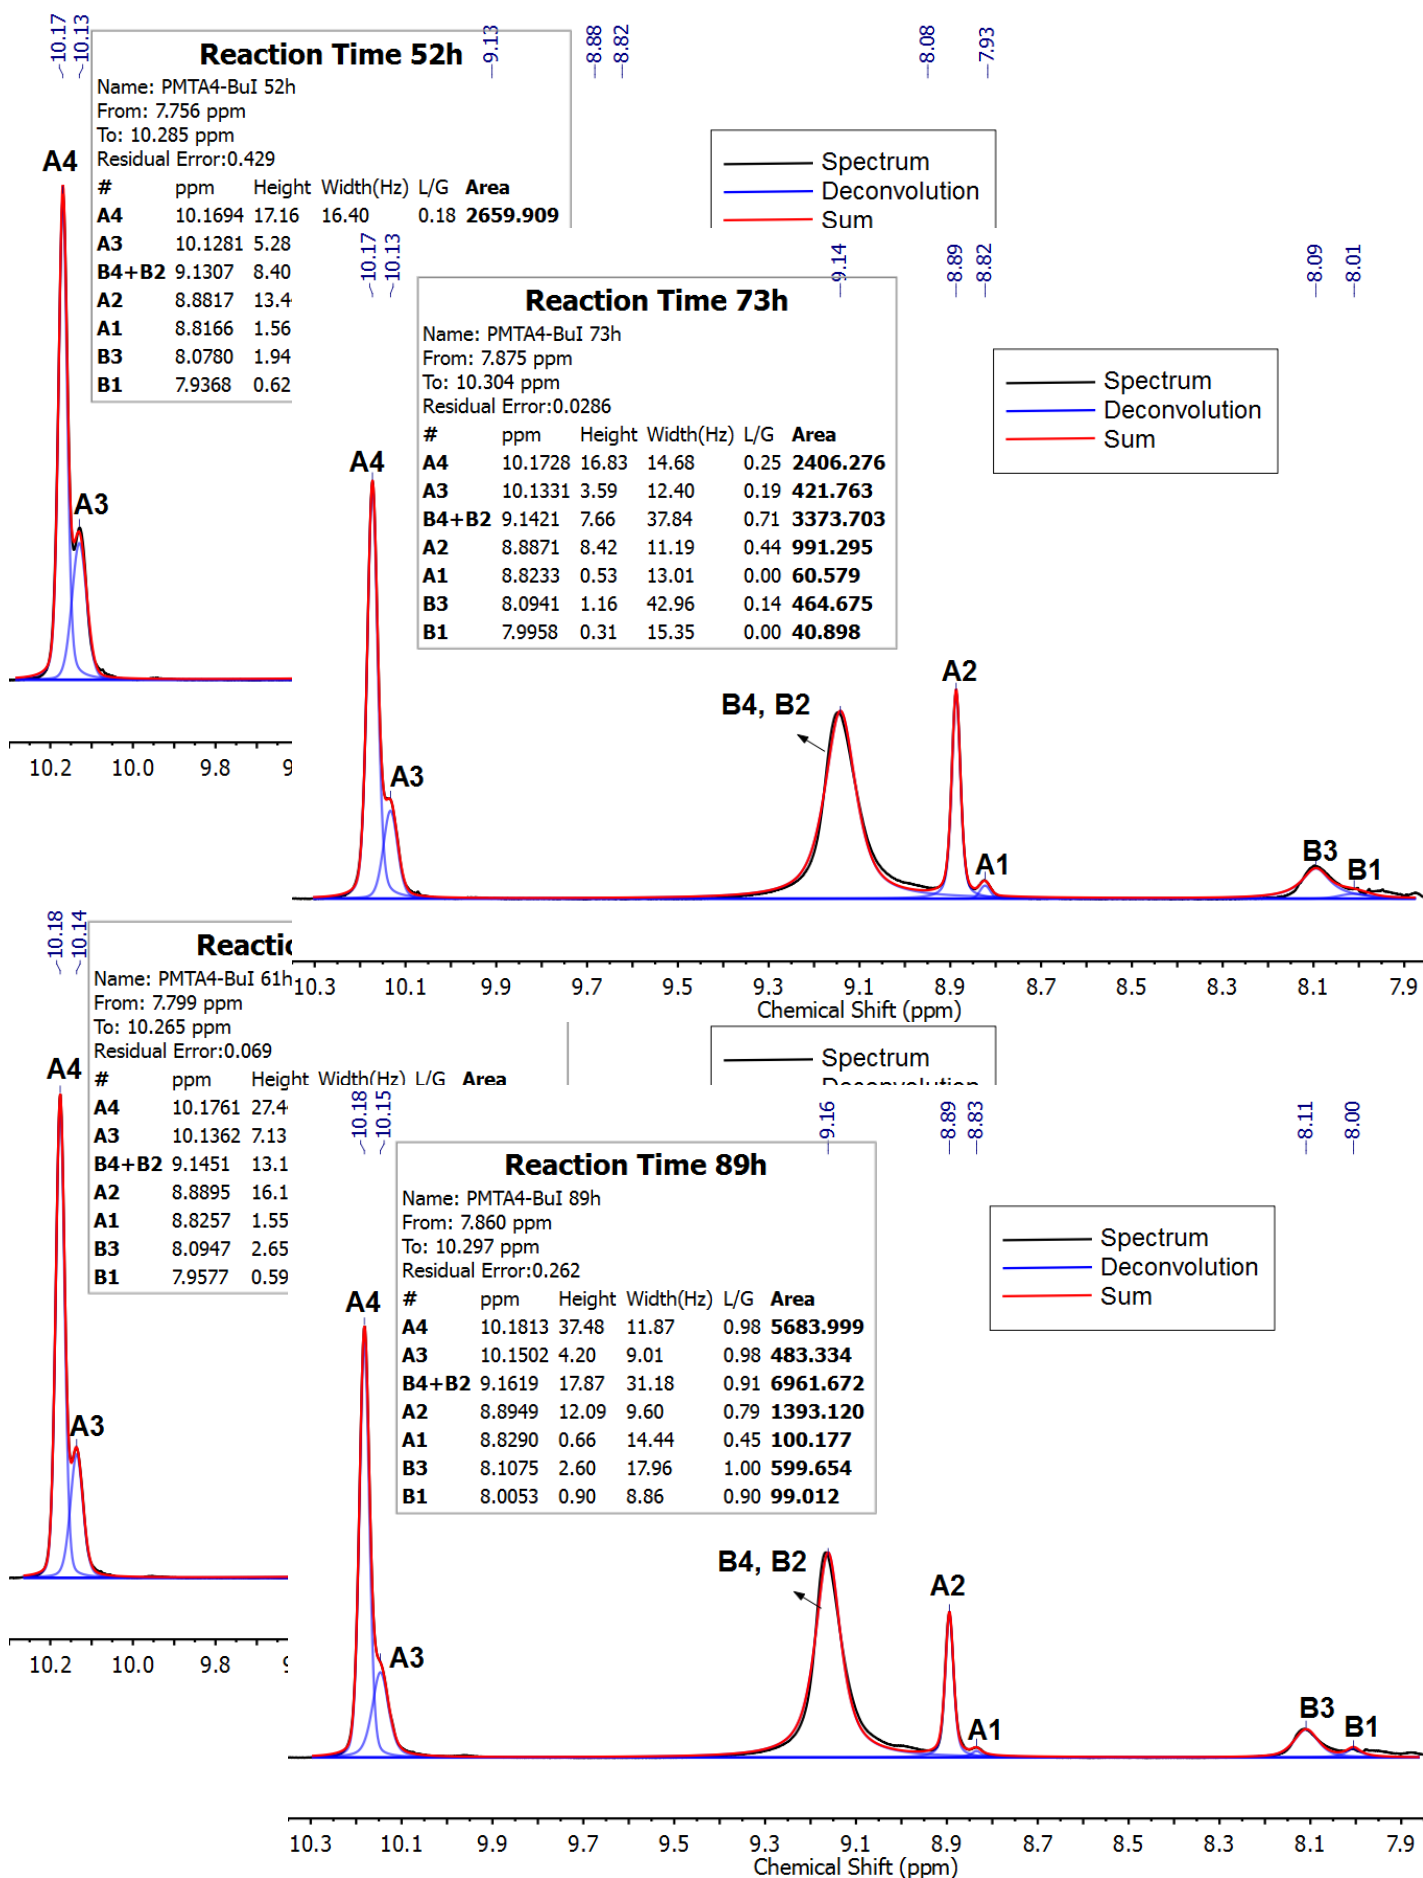

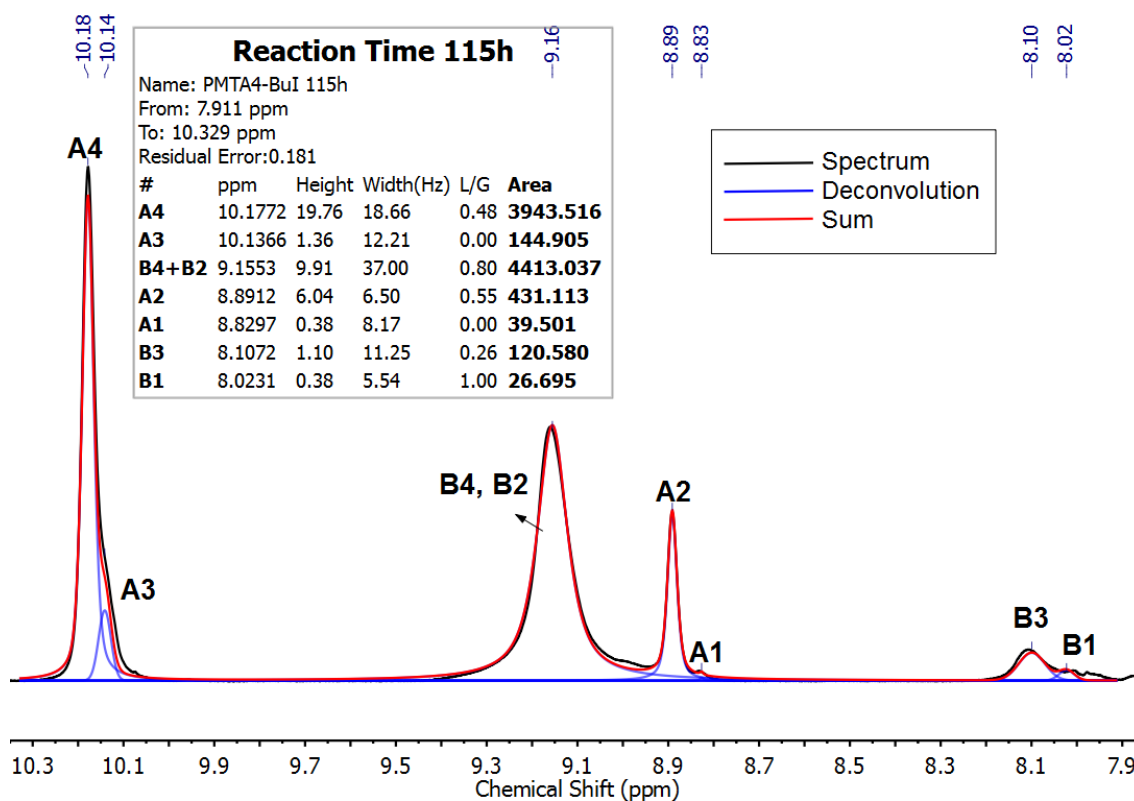

## 5. Integration Data and Species (%) involved During Quaternization Reaction of PMTA4

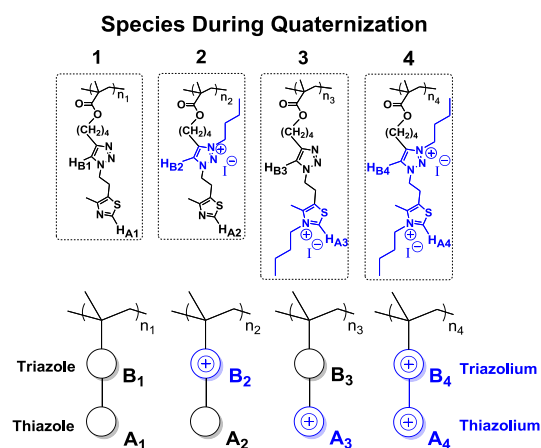

Table S1. Integration Data of Thiazole/Thiazolium protons involved in every species

| Reaction Time (h) | Thiazolium A <sub>4</sub> | Thiazolium A <sub>3</sub> | Thiazole A <sub>2</sub> | Thiazole A <sub>1</sub> | Global Thiazole A <sub>4</sub> +A <sub>3</sub> +A <sub>2</sub> +A <sub>1</sub> | DQth (%) (A <sub>4</sub> +A <sub>3</sub> )/(A <sub>4</sub> +A <sub>3</sub> +A <sub>2</sub> +A <sub>1</sub> ) |
|-------------------|---------------------------|---------------------------|-------------------------|-------------------------|--------------------------------------------------------------------------------|--------------------------------------------------------------------------------------------------------------|
| 0                 | 0                         | 0                         | 0                       | 100                     | 100                                                                            | 0                                                                                                            |
| 3                 | 1                         | 556                       | 1234                    | 9436                    | 11227                                                                          | 4.96125                                                                                                      |
| 5                 | 327.4                     | 741.4                     | 1627.3                  | 7695.3                  | 10391.4                                                                        | 10.28543                                                                                                     |
| 7                 | 256.484                   | 1080.176                  | 2329.05                 | 7552.05                 | 11217.76                                                                       | 11.91557                                                                                                     |
| 11                | 763.965                   | 959.659                   | 1606.561                | 5049.338                | 8379.523                                                                       | 20.56948                                                                                                     |
| 17                | 1301.75                   | 1545.75                   | 3123.75                 | 4454.75                 | 10426                                                                          | 27.31153                                                                                                     |
| 24                | 1700                      | 2047                      | 3512                    | 2298                    | 9557                                                                           | 39.20686                                                                                                     |
| 30                | 1936.25                   | 1851.25                   | 2912.25                 | 1258.25                 | 7958                                                                           | 47.59362                                                                                                     |
| 38                | 3472                      | 2474                      | 4100                    | 1082                    | 11128                                                                          | 53.43278                                                                                                     |
| 52                | 2660                      | 1394                      | 2086                    | 247                     | 6387                                                                           | 63.47268                                                                                                     |
| 61                | 3222.193                  | 1231.825                  | 1818.82                 | 93.248                  | 6366.086                                                                       | 69.96478                                                                                                     |
| 73                | 2406.247                  | 421.214                   | 991.295                 | 60.579                  | 3879.335                                                                       | 72.8852                                                                                                      |
| 89                | 5683                      | 483                       | 1394                    | 100                     | 7660                                                                           | 80.49608                                                                                                     |
| 115               | 3945                      | 145                       | 430                     | 40                      | 4560                                                                           | 89.69298                                                                                                     |
| 138               | 100                       | 0                         | 0                       | 0                       | 100                                                                            | 100                                                                                                          |

Table S2. Integration Data of Triazole/Triazolium protons involved in every species

| Reaction Time (h) | Triazolium B <sub>4</sub> +B <sub>2</sub> | Triazole B <sub>3</sub> | Triazole B <sub>1</sub> | Global Triazole B <sub>4</sub> +B <sub>2</sub> +B <sub>3</sub> +B <sub>1</sub> | DQtr (%) (B <sub>4</sub> +B <sub>2</sub> )/(B <sub>4</sub> +B <sub>2</sub> +B <sub>3</sub> +B <sub>1</sub> ) |
|-------------------|-------------------------------------------|-------------------------|-------------------------|--------------------------------------------------------------------------------|--------------------------------------------------------------------------------------------------------------|
| 0                 | 0                                         | 0                       | 100                     | 100                                                                            | 0                                                                                                            |
| 3                 | 1216                                      | 560                     | 9451                    | 11227                                                                          | 10.83103                                                                                                     |
| 5                 | 1900.945                                  | 745                     | 7745.529                | 10391.474                                                                      | 18.29331                                                                                                     |
| 7                 | 2589.24                                   | 1151.36                 | 7477.16                 | 11217.76                                                                       | 23.08161                                                                                                     |
| 11                | 2427.533                                  | 982                     | 4970                    | 8379.533                                                                       | 28.96979                                                                                                     |
| 17                | 4452                                      | 1637                    | 4337                    | 10426                                                                          | 42.70094                                                                                                     |
| 24                | 5082                                      | 2133                    | 2342                    | 9557                                                                           | 53.17568                                                                                                     |
| 30                | 4900                                      | 1816                    | 1242                    | 7958                                                                           | 61.57326                                                                                                     |
| 38                | 7646                                      | 2506                    | 976                     | 11128                                                                          | 68.70956                                                                                                     |
| 52                | 4845                                      | 1400                    | 142                     | 6387                                                                           | 75.85721                                                                                                     |
| 61                | 5160.4                                    | 1138.104                | 68.03                   | 6366.534                                                                       | 81.05509                                                                                                     |
| 73                | 3374                                      | 465.66                  | 40                      | 3879.66                                                                        | 86.96638                                                                                                     |
| 89                | 6961                                      | 600                     | 99                      | 7660                                                                           | 90.87467                                                                                                     |
| 115               | 4413                                      | 120                     | 27                      | 4560                                                                           | 96.86128                                                                                                     |
| 138               | 100                                       | 0                       | 0                       | 100                                                                            | 99                                                                                                           |

**Species 1 (%): Side chain tails with nonquaternized Triazole-Thiazole rings:**

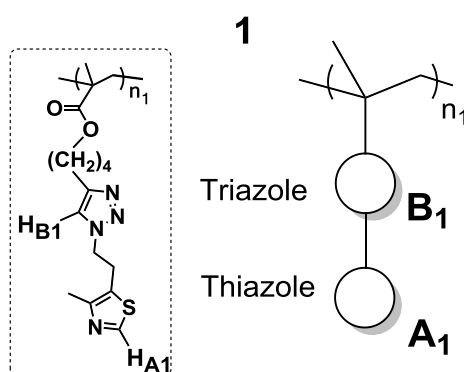

The percentage of **Species 1** can be determined following two equivalent equations due its chemical nature:

$$\text{Species 1 (\%)} = \frac{\text{Integral (Triazole B}_1\text{)}}{\text{Integral (Triazolium B}_2\text{ + B}_4\text{ + Triazole B}_3\text{ + B}_1\text{)}} \times 100$$

$$\text{Species 1 (\%)} = \frac{\text{Integral (Thiazole A}_1\text{)}}{\text{Integral (Thiazolium A}_4\text{ + A}_3\text{ + Thiazole A}_2\text{ + A}_1\text{)}} \times 100$$

In this case, Species 1 (%) determined by integrals of peaks related to thiazole (A<sub>1</sub>) or triazole (B<sub>1</sub>) protons, respectively, must be in accordance as shown in Table S3 and Figure S3A.

Table S3. Integration Data of Thiazole (A<sub>1</sub>) and Triazole (B<sub>1</sub>) protons involved in Species 1

| Reaction Time (h) | SPECIES 1 (%): Nonquaternized Heterocycles                                                                                |                                                                                                                           |
|-------------------|---------------------------------------------------------------------------------------------------------------------------|---------------------------------------------------------------------------------------------------------------------------|
|                   | From Thiazole Peak (A <sub>1</sub> )<br>A <sub>1</sub> /(A <sub>1</sub> +A <sub>2</sub> +A <sub>3</sub> +A <sub>4</sub> ) | From Triazole Peak (B <sub>1</sub> )<br>B <sub>1</sub> /(B <sub>1</sub> +B <sub>2</sub> +B <sub>3</sub> +B <sub>4</sub> ) |
| 0                 | 100                                                                                                                       | 100                                                                                                                       |
| 3                 | 84.04739                                                                                                                  | 84.18099                                                                                                                  |
| 5                 | 74.05451                                                                                                                  | 74.53735                                                                                                                  |
| 7                 | 67.32226                                                                                                                  | 66.65466                                                                                                                  |
| 11                | 60.25806                                                                                                                  | 59.31118                                                                                                                  |
| 17                | 42.72732                                                                                                                  | 41.59793                                                                                                                  |
| 24                | 24.0452                                                                                                                   | 24.5056                                                                                                                   |
| 30                | 15.81113                                                                                                                  | 15.60694                                                                                                                  |
| 38                | 9.72322                                                                                                                   | 8.77067                                                                                                                   |
| 52                | 3.86723                                                                                                                   | 2.22327                                                                                                                   |
| 61                | 1.46476                                                                                                                   | 1.06856                                                                                                                   |
| 73                | 1.56158                                                                                                                   | 1.03102                                                                                                                   |
| 89                | 1.30548                                                                                                                   | 1.29243                                                                                                                   |
| 115               | 0.87719                                                                                                                   | 0.59211                                                                                                                   |
| 138               | 0                                                                                                                         | 0                                                                                                                         |

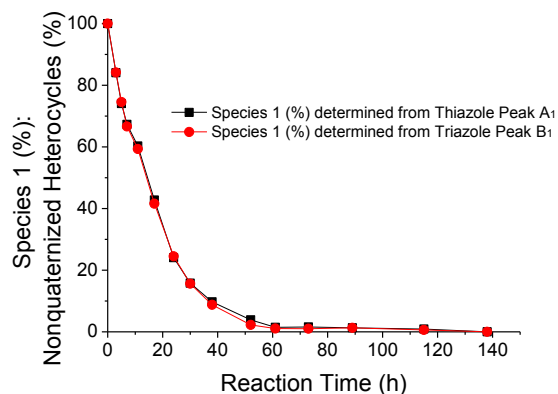

Figure S3A. Species 1 (%) determined from thiazole (A<sub>1</sub>) or triazole (B<sub>1</sub>) protons, respectively.

- SPECIES 2 (%): Monocationic Side chain tails with Triazolium-Thiazole rings**

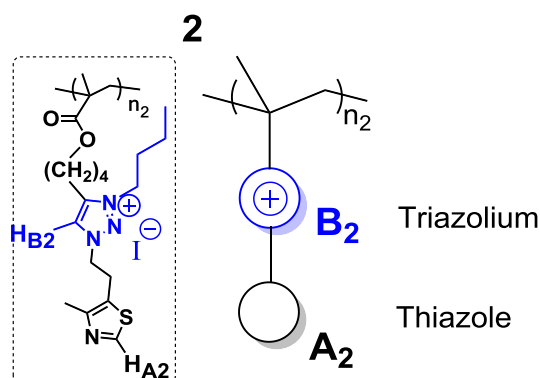

The percentage of monocationic Species 2 can be easily determined by the relationship between the integral corresponding to A<sub>2</sub> proton (in case of thiazole heterocycle) and the rest of thiazole protons or B<sub>2</sub> proton (in case of triazolium ring) and the rest of triazole protons involved applying any of the next two equations:

$$\text{Species 2 (\%)} = \frac{\text{Integral (Triazolium B}_2\text{)}}{\text{Integral (Triazolium B}_2\text{ + B}_4\text{ + Thiazole B}_3\text{ + B}_1\text{)}} \times 100$$

$$\text{Species 2 (\%)} = \frac{\text{Integral (Thiazole A}_2\text{)}}{\text{Integral (Thiazolium A}_4\text{ + A}_3\text{ + Thiazole A}_2\text{ + A}_1\text{)}} \times 100$$

In case of triazolium heterocycle, the latter equation cannot be applied since B<sub>2</sub> protons are overlapped with B<sub>4</sub> protons during all quaternization reaction. Anyway, both equations are also equivalent.

Table S4. Integration Data of Thiazole protons involved in Species 2

| Reaction Time (h) | SPECIES 2 (%): Monocationic Side Chain Tails with Triazolium-Thiazole Rings (%) |
|-------------------|---------------------------------------------------------------------------------|
|                   | From Thiazole Peak ( $A_2$ )<br>$A_2/(A_1+A_2+A_3+A_4)$                         |
| 0                 | 0                                                                               |
| 3                 | 10.99136                                                                        |
| 5                 | 15.66007                                                                        |
| 7                 | 20.76217                                                                        |
| 11                | 25.57246                                                                        |
| 17                | 29.96115                                                                        |
| 24                | 33.74793                                                                        |
| 30                | 36.59525                                                                        |
| 38                | 36.844                                                                          |
| 52                | 32.66009                                                                        |
| 61                | 28.57046                                                                        |
| 73                | 25.55322                                                                        |
| 89                | 18.19843                                                                        |
| 115               | 9.42982                                                                         |
| 138               | 0                                                                               |

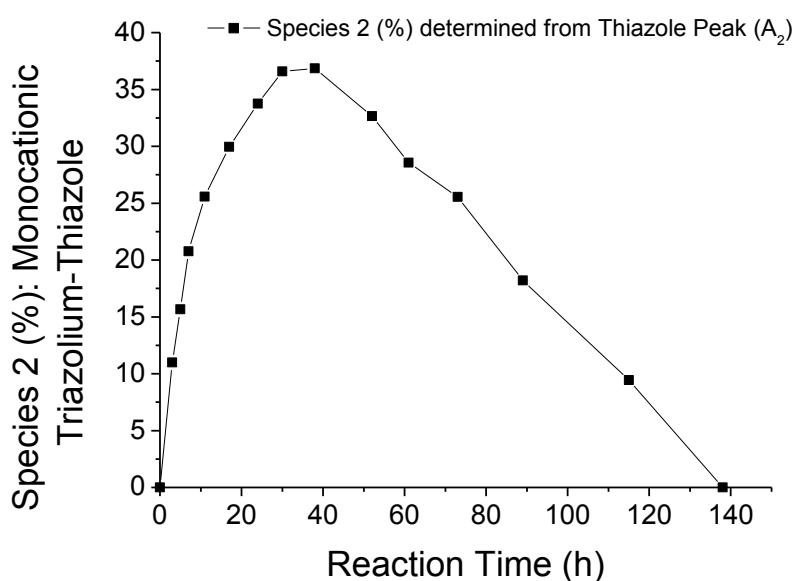

Figure S3B. Species 2 (%) determined from thiazole protons ( $A_2$ ).

The representation of Species 2 (%) versus reaction time (h) gives as a result a parabolic curve (as can be seen in Figure S3B). This indicates that at the beginning of the reaction the triazole groups are logically quaternized from non-quaternized Species 1 and not from monocationic species due to the more cationic repulsion or steric hindrance evolved.

Therefore, when the quaternization of monocationic triazolium species is complete the proportion of monocationic groups decreases until the end of the reaction given rise to the formation of dicationic ones. This explains the parabolic behaviour.

**SPECIES 3 (%): Monocationic side chain Thiazolium-Triazole tails:**

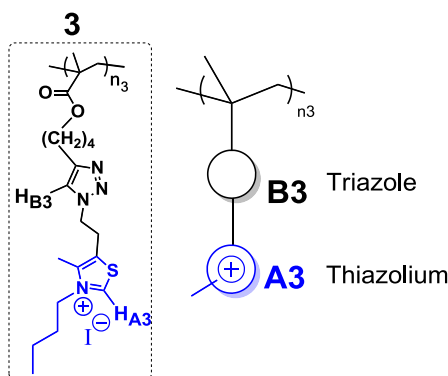

The percentage of monocationic side-chain thiazolium and triazole groups in the N-alkylating reaction can be calculated by the relationship between the integrals corresponding to the signals  $A_3$  (for the thiazolium group) and the rest of signals associated to this heterocycles, or alternatively, from the signal  $B_3$  for the triazole group and the rest of signals associated to triazole. The obtained results must be similar considering to any of the heterocycles involved:

$$\text{Species 3 (\%)} = \frac{\text{Integral (Triazole } B_3)}{\text{Integral (Thiazolium } B_2 + B_4 + \text{Triazole } B_3 + B_1)} \times 100$$

$$\text{Species 3 (\%)} = \frac{\text{Integral (Thiazolium } A_3)}{\text{Integral (Thiazolium } A_4 + A_3 + \text{Thiazole } A_2 + A_1)} \times 100$$

Table S5. Integration Data of Thiazolium and Triazole protons involved in Species 3

| Reaction Time (h) | SPECIES 3 (%): Monocationic Thiazolium and Triazole Group         |                                                                 |
|-------------------|-------------------------------------------------------------------|-----------------------------------------------------------------|
|                   | From Thiazolium Peak (A <sub>3</sub> )<br>$A_3/(A_1+A_2+A_3+A_4)$ | From Triazole Peak (B <sub>3</sub> )<br>$B_3/(B_1+B_2+B_3+B_4)$ |
| 0                 | 0                                                                 | 0                                                               |
| 3                 | 4.95235                                                           | 4.98798                                                         |
| 5                 | 7.13475                                                           | 7.16934                                                         |
| 7                 | 9.62916                                                           | 10.26372                                                        |
| 11                | 13.45243                                                          | 13.71903                                                        |
| 17                | 14.82592                                                          | 15.70113                                                        |
| 24                | 21.41886                                                          | 22.31872                                                        |
| 30                | 23.26275                                                          | 22.8198                                                         |
| 38                | 22.23221                                                          | 22.51977                                                        |
| 52                | 21.82558                                                          | 21.91952                                                        |
| 61                | 19.3498                                                           | 17.87635                                                        |
| 73                | 10.85789                                                          | 12.0026                                                         |
| 89                | 6.30548                                                           | 7.8329                                                          |
| 115               | 3.17982                                                           | 2.63158                                                         |
| 138               | 0                                                                 | 0                                                               |

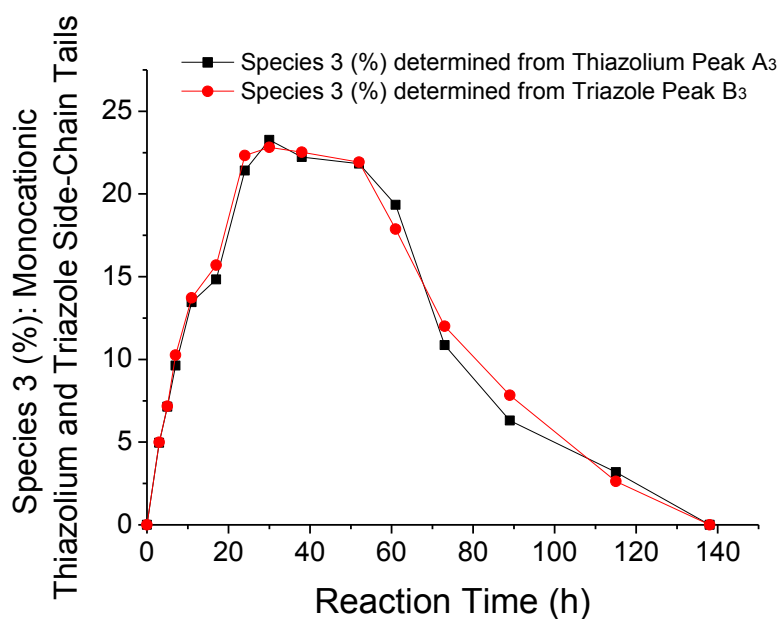

Figure S3C. Species 3 (%) determined from thiazolium (A<sub>3</sub>) or triazole (B<sub>3</sub>) protons, respectively.

By plotting the Species 3 (%) versus reaction time (h), also appears a parabolic behaviour during the course of the reaction (as can be seen in Figure S3C).



#### SPECIES 4 (%): Biscationic Side Chain Triazolium and Thiazolium Rings

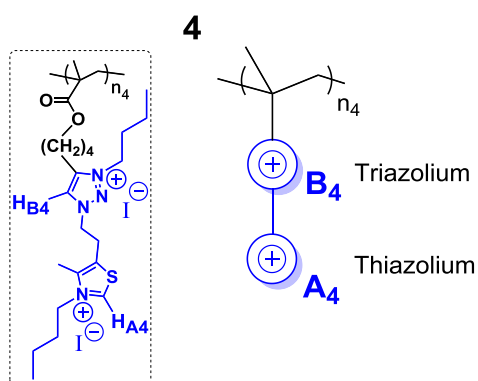

The percentage of Species 4 related to biscationic side chain quaternized heterocycles can be easily calculated by the relationship between the integral corresponding to A<sub>4</sub> proton in case of thiazolium heterocycle and the rest of thiazole protons applying next equations:

$$\text{Specie 4 (\%)} = \frac{\text{Integral ( Triazolium B}_4\text{)}}{\text{Integral (Triazolium B}_2\text{ + B}_4\text{ + Triazole B}_3\text{ + B}_1\text{)}} \times 100$$

$$\text{Specie 4 (\%)} = \frac{\text{Integral ( Thiazolium A}_4\text{)}}{\text{Integral (Thiazolium A}_4\text{ + A}_3\text{ + Thiazole A}_2\text{ + A}_1\text{)}} \times 100$$

In case of triazolium heterocycle, it is not possible to consider B<sub>4</sub> protons because they are overlapped with B<sub>2</sub> protons during all quaternization reaction, so the first equation cannot be applied. Nevertheless, both equations are also equivalent.

Table S6. Integration Data of Thiazolium protons involved in Species 4

| Reaction Time (h) | <b>SPECIES 4 (%):</b><br><b>Biscationic Quaternized Heterocycles Side-Chain Tails</b>                                         |
|-------------------|-------------------------------------------------------------------------------------------------------------------------------|
|                   | <b>From Thiazolium Peak (A<sub>4</sub>)</b><br><b>A<sub>4</sub>/(A<sub>1</sub>+A<sub>2</sub>+A<sub>3</sub>+A<sub>4</sub>)</b> |
| 0                 | 0                                                                                                                             |
| 3                 | 0.00891                                                                                                                       |
| 5                 | 3.15068                                                                                                                       |
| 7                 | 2.28641                                                                                                                       |
| 11                | 9.11705                                                                                                                       |
| 17                | 12.48561                                                                                                                      |
| 24                | 17.78801                                                                                                                      |
| 30                | 24.33086                                                                                                                      |
| 38                | 31.20058                                                                                                                      |
| 52                | 41.6471                                                                                                                       |
| 61                | 50.61498                                                                                                                      |
| 73                | 62.02731                                                                                                                      |
| 89                | 74.1906                                                                                                                       |
| 115               | 86.51316                                                                                                                      |
| 138               | 100                                                                                                                           |

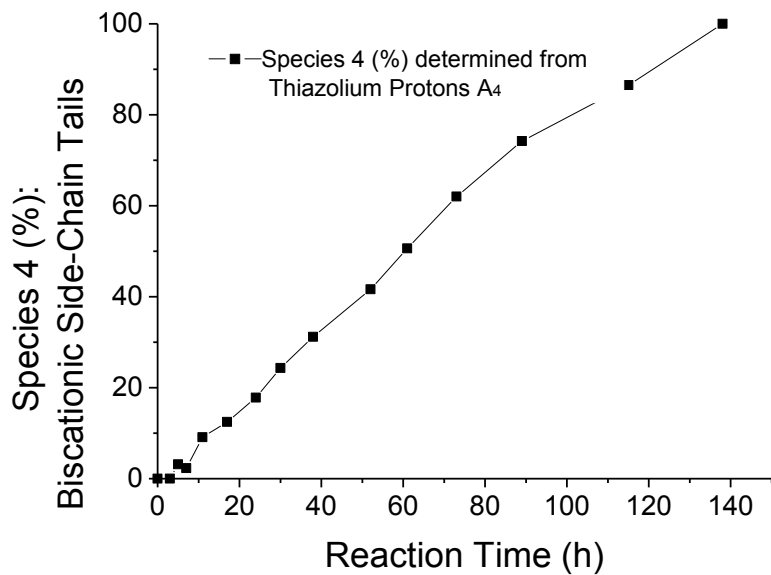

Figure S3D. Species 4 (%) determined from thiazolium protons A<sub>4</sub>.

Finally, there are another three more calculations in order to achieve a Confirmatory Analysis of these results presented above.

1) DQth should be determined by two equivalent calculations from thiazolium peaks ( $A_4 + A_3$ ) or as the sum of the Species 4 (%) (thiazolium peak  $A_4$ ) and Species 3 (%) (Triazole peak  $B_3$ ).

Table S7. Integration Data of Thiazolium and Triazole protons involved in the determination of DQth (%)

| Reaction Time (h) | DQth (%)<br>$(A_4 + A_3) / (A_4 + A_3 + A_2 + A_1)$ | SPECIES 4 (%):<br>Biscatonic Side Chain Tails                     | SPECIES 3 (%):<br>Monocationic Thiazolium and Triazole Groups (%) | DQth (%) =<br>SPECIES 4 (%) + SPECIES 3 (%) |
|-------------------|-----------------------------------------------------|-------------------------------------------------------------------|-------------------------------------------------------------------|---------------------------------------------|
|                   |                                                     | From Thiazolium Peak ( $A_4$ )<br>$A_4 / (A_1 + A_2 + A_3 + A_4)$ | From Triazole Peak ( $B_3$ )<br>$B_3 / (B_1 + B_2 + B_3 + B_4)$   |                                             |
| 0                 | 0                                                   | 0                                                                 | 0                                                                 | 0                                           |
| 3                 | 4.96125                                             | 0.00891                                                           | 4.98798                                                           | 4.99688                                     |
| 5                 | 10.28543                                            | 3.15068                                                           | 7.16934                                                           | 10.32002                                    |
| 7                 | 11.91557                                            | 2.28641                                                           | 10.26372                                                          | 12.55013                                    |
| 11                | 20.56948                                            | 9.11705                                                           | 13.71903                                                          | 20.83608                                    |
| 17                | 27.31153                                            | 12.48561                                                          | 15.70113                                                          | 28.18674                                    |
| 24                | 39.20686                                            | 17.78801                                                          | 22.31872                                                          | 40.10673                                    |
| 30                | 47.59362                                            | 24.33086                                                          | 22.8198                                                           | 47.15067                                    |
| 38                | 53.43278                                            | 31.20058                                                          | 22.51977                                                          | 53.72035                                    |
| 52                | 63.47268                                            | 41.6471                                                           | 21.91952                                                          | 63.56662                                    |
| 61                | 69.96478                                            | 50.61498                                                          | 17.87635                                                          | 68.49133                                    |
| 73                | 72.8852                                             | 62.02731                                                          | 12.0026                                                           | 74.0299                                     |
| 89                | 80.49608                                            | 74.1906                                                           | 7.8329                                                            | 82.0235                                     |
| 115               | 89.69298                                            | 86.51316                                                          | 2.63158                                                           | 89.14474                                    |
| 138               | 100                                                 | 100                                                               | 0                                                                 | 100                                         |

2) In the same way, DQtr should be determined by two equivalent calculations from triazolium peaks ( $B_4 + B_2$ ) or as the sum of the Species 4 (%) (thiazolium peak  $A_4$ ) and Species 2 (%) (Thiazole peak  $A_2$ ).

Table S8. Integration Data of Triazolium and Thiazolium and Thiazole protons involved in the determination of DQtr (%)

| Reaction Time (h) | DQtr (%)<br>$(B_4+B_2)/ (B_4+B_2+B_3+B_1)$ | SPECIES 4 (%):<br>Biscationic Side Chain Tails            | SPECIES 2 (%):<br>Monocationic Triazolium and Thiazole Groups (%) | DQtr (%) =<br>SPECIES 4 (%) + SPECIES 2 (%) |
|-------------------|--------------------------------------------|-----------------------------------------------------------|-------------------------------------------------------------------|---------------------------------------------|
|                   |                                            | From Thiazolium Peak ( $A_4$ )<br>$A_4/(A_1+A_2+A_3+A_4)$ | From Thiazole Peak ( $A_2$ )<br>$A_2/(A_1+A_2+A_3+A_4)$           |                                             |
| 0                 | 0                                          | 0                                                         | 0                                                                 | 0                                           |
| 3                 | 10.83103                                   | 0.00891                                                   | 10.99136                                                          | 11.00027                                    |
| 5                 | 18.29331                                   | 3.15068                                                   | 15.66007                                                          | 18.81075                                    |
| 7                 | 23.08161                                   | 2.28641                                                   | 20.76217                                                          | 23.04858                                    |
| 11                | 28.96979                                   | 9.11705                                                   | 25.57246                                                          | 28.28951                                    |
| 17                | 42.70094                                   | 12.48561                                                  | 29.96115                                                          | 42.44677                                    |
| 24                | 53.17568                                   | 17.78801                                                  | 33.74793                                                          | 54.53594                                    |
| 30                | 61.57326                                   | 24.33086                                                  | 36.59525                                                          | 60.92611                                    |
| 38                | 68.70956                                   | 31.20058                                                  | 36.844                                                            | 68.04457                                    |
| 52                | 75.85721                                   | 41.6471                                                   | 32.66009                                                          | 74.30719                                    |
| 61                | 81.05509                                   | 50.61498                                                  | 28.57046                                                          | 79.18544                                    |
| 73                | 86.96638                                   | 62.02731                                                  | 25.55322                                                          | 87.58053                                    |
| 89                | 90.87467                                   | 74.1906                                                   | 18.19843                                                          | 92.38903                                    |
| 115               | 96.86128                                   | 86.51316                                                  | 9.42982                                                           | 95.94298                                    |
| 138               | 99                                         | 100                                                       | 0                                                                 | 100                                         |

3) Similarly, Species 1 (%) should be determined by three equivalent calculations from thiazole peak ( $A_1$ ) or triazole one ( $B_1$ ) or as the 100% of species minus the sum of the rest of calculated mono or biscationic Species (%)

**Table S9.** Integration Data of Thiazole and Triazole protons involved in the determination of DQth (%)

| Reaction Time (h) | SPECIES 1 (%): Nonquaternized Heterocycles                      |                                                                 | SPECIES 1 (%):<br>100% - The Rest of Species (%) |
|-------------------|-----------------------------------------------------------------|-----------------------------------------------------------------|--------------------------------------------------|
|                   | From Thiazole Peak (A <sub>1</sub> )<br>$A_1/(A_1+A_2+A_3+A_4)$ | From Triazole Peak (B <sub>1</sub> )<br>$B_1/(B_1+B_2+B_3+B_4)$ |                                                  |
| 0                 | 100                                                             | 100                                                             | 100                                              |
| 3                 | 84.04739                                                        | 84.18099                                                        | 84.01176                                         |
| 5                 | 74.05451                                                        | 74.53735                                                        | 74.01991                                         |
| 7                 | 67.32226                                                        | 66.65466                                                        | 66.6877                                          |
| 11                | 60.25806                                                        | 59.31118                                                        | 51.59146                                         |
| 17                | 42.72732                                                        | 41.59793                                                        | 41.8521                                          |
| 24                | 24.0452                                                         | 24.5056                                                         | 26.14534                                         |
| 30                | 15.81113                                                        | 15.60694                                                        | 16.25408                                         |
| 38                | 9.72322                                                         | 8.77067                                                         | 9.43566                                          |
| 52                | 3.86723                                                         | 2.22327                                                         | 3.77329                                          |
| 61                | 1.46476                                                         | 1.06856                                                         | 2.93821                                          |
| 73                | 1.56158                                                         | 1.03102                                                         | 0.41688                                          |
| 89                | 1.30548                                                         | 1.29243                                                         | -0.22193*                                        |
| 115               | 0.87719                                                         | 0.59211                                                         | 1.42544                                          |
| 138               | 0                                                               | 0                                                               | 0                                                |

\* In this case, the negative value is not possible but is only write it down to visualize the meaning of determination.

## 6. Biological Assays.

### 6.1 Antimicrobial Microbroth Dilution Assay

Bacterial isolates were cultured on 5% sheep blood Columbia agar for 24 h at 37 °C, after which a microorganism suspension of  $2 \times 10^8$  CFU/mL in sterile 0.9% saline was prepared to obtain a turbidity equivalent to that of the 0.5-1 McFarland opacity standard and was always used in the next step no later than 15 min. This inoculum suspension was further diluted 1:100 in Mueller-Hinton broth to yield a microorganism suspension of  $2 \times 10^6$  CFU/mL. Then, each polymer was dissolved in a mixture of autoclaved water and the minimum amount of DMSO (5%, v/v) to make a stock solution of 256 µg/mL in which no precipitate appeared neither DMSO did interfere with measurements. Then, 50 µL of broth were added into all the wells of a sterile 96-well microplate (except in the first column) and 100 µL of monomer or polymer stock solution was pipetted into the first column of wells. Then, 50 µL of polymer solution was diluted by 2-fold serial dilutions in the rest of wells (except in the last column). Briefly, all wells of the broth microdilution plates were inoculated with 50 µL of each test microorganism samples for a total volume of 100 µL to yield the standard density of  $5 \times 10^5$  CFU/mL and affording final monomer and polymer concentrations of 128, 64, 32, 16, 8, 4, 2, 1, 0.5, 0.25 and 0.125 µg/mL. To ensure that the solvent had no effect on bacterial growth, a negative control test was performed with test medium supplemented with DMSO at the same dilutions used in the experiment. The last column of wells with no polymer was used as positive growth control on each plate. The plates were then incubated at 37 °C in ambient air for 24 h for bacteria, respectively. Plates were read for visual turbidity, and MIC was defined as the lowest monomer or polymer concentration at which visible growth of the microorganism was inhibited. All antimicrobial tests were carried out in triplicate and were also repeated on at least two different days. MICs are reported as the most repeated value with an estimated error of +/- one order of dilution. The results are summarized in **Table S10**.

### 6.2 Hemolytic Assay

Human Red Blood Cells (RBC), were collected in heparinized-tubes from freshly drawn clinical samples and were centrifuged at 3100 rpm for 10 min and washed three times with cold PBS (pH 7.4) in order to remove plasma and white blood cells. The solution was suspended to 5% (v/v) in the same buffer to yield the RBC stock suspension and was always used within 24 h after collection. Each polymer was dissolved in DMSO/PBS (1:1, v/v, pH 7.4) to afford a stock solution of 20 mg/mL. Then, 50 µL of PBS were added into all the wells of a sterile 96-well microplate (except in the first column) and 100 µL of the polymer stock solution was pipetted into the first column of wells. Then, 50 µL of each polymer solution was diluted by 2-fold serial dilution in the rest of wells (except in the last column). Briefly, RBC

stock (150  $\mu$ L) was then added to each well for a total volume of 200  $\mu$ L to obtain the final polymer concentrations of 5000, 2500, 1250, 625, 312.5, 156, 78, 39, 19 and 9.75  $\mu$ g/mL. Positive control (100% hemolysis) was monitored by adding 50  $\mu$ L of Triton X-100 solution 1% in PBS (v/v) and 150  $\mu$ L of RBC stock. Negative control (0% hemolysis) was performed by adding 150  $\mu$ L of RBC stock in 50  $\mu$ L of PBS in the last column of wells. To ensure that the solvent had no effect on hemolysis, an extra negative control test was performed with 50  $\mu$ L of DMSO/PBS (1:1, v/v) and 150  $\mu$ L of RBC stock. The plate was incubated at 37  $^{\circ}$ C for 1 h and centrifuged then at 3100 rpm for 10 min to settle the non-lysed cells and 100  $\mu$ L of supernatant from each well was pipetted out into a new sterile 96-well microplate and the absorbance of wells was measured at 550 nm. Percentage of hemolysis was determined as follows:

$$\text{Hemolysis (\%)} = (A - A_0) / (A_{100} - A_0) \times 100$$

where A is the absorbance of the test compound,  $A_0$  the absorbance of the negative control (0% hemolysis) and  $A_{100}$  the absorbance of the positive control (100% hemolysis). Hemolysis (%) was plotted against polymer concentration and the concentration of polymer that causes 50% hemolysis ( $HC_{50}$ ) was estimated by dose-response sigmoidal curve fitting.  $HC_{50}$  is reported as the average and standard errors from different experiments performed in triplicates. To quantify the selectivity of **PMTA1-Bul** and **PMTA4-Bul** polymers with different DQ against microorganisms over RBC, the Selectivity Index, defined as  $HC_{50}/MIC$ , was determined, which is also summarized in the Table S10. Hemolysis dose-response sigmoidal curves for each polymer are given in Figures S4A and S4B.

**Table S10.** Minimum Inhibitory Concentration (MIC), Selectivity Index (HC<sub>50</sub>/MIC) and HC<sub>50</sub> values with standard deviations (SD) of **PMTA1-Bul** and **PMTA4-Bul** at various **DQth**.

| <b>PMTA1-Bul</b><br><b>DQth (%)</b> | <b><i>P. aeruginosa</i></b><br><b>(ATCC® 27853)</b><br><b>MIC (µg/mL)</b> | <b>Selectivity</b><br><b>Index</b><br><b>(HC<sub>50</sub>/MIC)</b> | <b><i>S. aureus</i></b><br><b>(ATCC® 29213)</b><br><b>MIC (µg/mL)</b> | <b>Selectivity</b><br><b>Index</b><br><b>(HC<sub>50</sub>/MIC)</b> | <b>HC<sub>50</sub></b><br><b>(µg/mL)</b> |
|-------------------------------------|---------------------------------------------------------------------------|--------------------------------------------------------------------|-----------------------------------------------------------------------|--------------------------------------------------------------------|------------------------------------------|
| <b>10</b>                           | >128                                                                      | < 9                                                                | >128                                                                  | < 9                                                                | 1156 ± 234                               |
| <b>20</b>                           | 128                                                                       | 12                                                                 | 32                                                                    | 49                                                                 | 1588 ± 183                               |
| <b>30</b>                           | 32                                                                        | 76                                                                 | 16                                                                    | 153                                                                | 2445 ± 311                               |
| <b>40</b>                           | 16                                                                        | 194                                                                | 8                                                                     | 389                                                                | 3111 ± 260                               |
| <b>50</b>                           | 8                                                                         | 431                                                                | 4                                                                     | 862                                                                | 3446 ± 310                               |
| <b>60</b>                           | 8                                                                         | 528                                                                | 8                                                                     | 528                                                                | 4224 ± 203                               |
| <b>70</b>                           | 8                                                                         | > 625                                                              | 8                                                                     | > 625                                                              | > 5000                                   |
| <b>80</b>                           | 8                                                                         | > 625                                                              | 8                                                                     | > 625                                                              | > 5000                                   |
| <b>90</b>                           | 8                                                                         | > 625                                                              | 8                                                                     | > 625                                                              | > 5000                                   |
| <b>100</b>                          | 8                                                                         | > 625                                                              | 8                                                                     | > 625                                                              | > 5000                                   |
| <b>PMTA4-Bul</b><br><b>DQth (%)</b> | <b><i>P. aeruginosa</i></b><br><b>(ATCC® 27853)</b><br><b>MIC (µg/mL)</b> | <b>Selectivity</b><br><b>Index</b><br><b>(HC<sub>50</sub>/MIC)</b> | <b><i>S. aureus</i></b><br><b>(ATCC® 29213)</b><br><b>MIC (µg/mL)</b> | <b>Selectivity</b><br><b>Index</b><br><b>(HC<sub>50</sub>/MIC)</b> | <b>HC<sub>50</sub></b><br><b>(µg/mL)</b> |
| <b>10</b>                           | 128                                                                       | 20                                                                 | 64                                                                    | 39                                                                 | 2512 ± 252                               |
| <b>20</b>                           | 64                                                                        | 43                                                                 | 32                                                                    | 86                                                                 | 2764 ± 266                               |
| <b>30</b>                           | 16                                                                        | 159                                                                | 4                                                                     | 638                                                                | 2551 ± 103                               |
| <b>40</b>                           | 8                                                                         | 456                                                                | 4                                                                     | 913                                                                | 3651 ± 210                               |
| <b>50</b>                           | 8                                                                         | 515                                                                | 2                                                                     | 2058                                                               | 4116 ± 302                               |
| <b>60</b>                           | 8                                                                         | > 625                                                              | 4                                                                     | > 1250                                                             | > 5000                                   |
| <b>70</b>                           | 8                                                                         | > 625                                                              | 4                                                                     | > 1250                                                             | > 5000                                   |
| <b>80</b>                           | 8                                                                         | > 625                                                              | 4                                                                     | > 1250                                                             | > 5000                                   |
| <b>90</b>                           | 8                                                                         | > 625                                                              | 4                                                                     | > 1250                                                             | > 5000                                   |
| <b>100</b>                          | 4                                                                         | > 1250                                                             | 4                                                                     | > 1250                                                             | > 5000                                   |



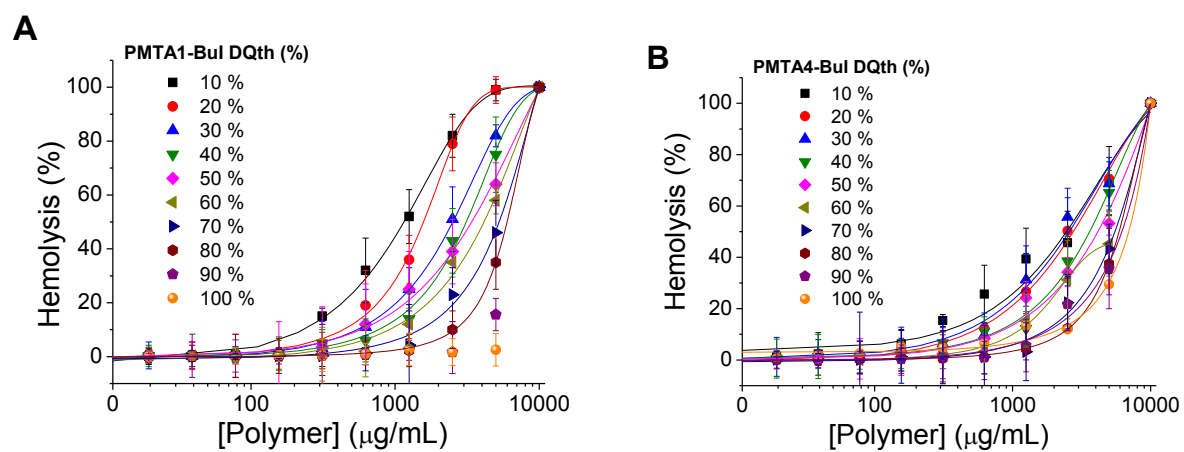

Figure S4. Dose-Response Hemolytic Curves. A) PMTA1-Bul with various DQth (%). B) PMTA4-Bul with various DQth (%).
